# Supplementary material
Source: MDPI journal article supplement (https://www.mdpi.com/1424-8247/17/5/592)
Supplement: s1 [file s1]

## Sequence alignment between *Ailuropoda melanoleuca* P2X7 (AmP2X7) and *Homo sapiens* P2X7 (HsP2X7) using BLAST

RID: P9XTZYJU114

Job Title:tr|G1M6C4|G1M6C4\_AILME ATP receptor OS=Ailuropoda...

Program: BLASTP

**Query:** tr|G1M6C4|G1M6C4\_AILME ATP receptor OS=Ailuropoda melanoleuca OX=9646

GN=P2RX7 PE=1 SV=2 ID: lcl|Query\_50083(amino acid) Length: 606

**Subject:**sp|Q99572|P2RX7\_HUMAN P2X purinoceptor 7 OS=Homo sapiens OX=9606 GN=P2RX7

PE=1 SV=4 ID: lcl|Query\_50085(amino acid) Length: 595

Sequences producing significant alignments:

|                                                                                      |       |               |                 |                                           |       |       | Scientific  |
|--------------------------------------------------------------------------------------|-------|---------------|-----------------|-------------------------------------------|-------|-------|-------------|
| Common                                                                               | Max   | Total         | Query           | E                                         | Per.  | Acc.  |             |
| Description                                                                          |       |               |                 |                                           |       |       | Name        |
| Name                                                                                 | Taxid | Score         | Score           | cover                                     | Value | Ident | Len         |
|                                                                                      |       |               |                 |                                           |       |       | Accession   |
| sp Q99572 P2RX7_HUMAN P2X purinoceptor 7 OS=Homo sapiens OX=96...                    |       |               |                 |                                           |       |       |             |
| 0                                                                                    | 1060  | 1060          | 98%             | 0.0                                       | 84.71 | 595   | Query_50085 |
| Alignments:                                                                          |       |               |                 |                                           |       |       |             |
| >sp Q99572 P2RX7_HUMAN P2X purinoceptor 7 OS=Homo sapiens OX=9606 GN=P2RX7 PE=1 SV=4 |       |               |                 |                                           |       |       |             |
| Sequence ID: Query_50085 Length: 595                                                 |       |               |                 |                                           |       |       |             |
| Range 1: 1 to 595                                                                    |       |               |                 |                                           |       |       |             |
| Score:1060 bits(2742), Expect:0.0,                                                   |       |               |                 |                                           |       |       |             |
| Method:Compositional matrix adjust.,                                                 |       |               |                 |                                           |       |       |             |
| Identities:504/595(85%), Positives:545/595(91%), Gaps:1/595(0%)                      |       |               |                 |                                           |       |       |             |
| Query                                                                                | 1     | MPACCSWKDV    | FQYETNKVLR      | IQSTNYGTIKWIFHVLVFSYISFALISDKRYQKKEPLISS  | 60    |       |             |
|                                                                                      |       | MPACCS        | DVFQYETNKV      | RIQS NYGTIKW FHV++FSY+ FAL+SDK YQ+KEP+ISS |       |       |             |
| Sbjct                                                                                | 1     | MPACCSCSDV    | FQYETNKVTRI     | QSMNYGTIKWFFHVIIIFSVCFALVSDKLYQRKEPVISS   | 60    |       |             |
| Query                                                                                | 61    | VHTKVKGIAE    | VEKAEILENGM     | KKMVSGVFDTADYTFPLQGNSFFVMTNFIKTEGQQQGLCP  | 120   |       |             |
|                                                                                      |       | VHTKVKGIAE    | VEK EI+ENG+KK+V | VEDTADYTFPLQGNSFFVMTNF+KTEGQ+Q LCP        |       |       |             |
| Sbjct                                                                                | 61    | VHTKVKGIAE    | VEKKEIIVENG     | VKKLVHVSVEDTADYTFPLQGNSFFVMTNFIKTEGQEQLCP | 120   |       |             |
| Query                                                                                | 121   | DFPTRRTICSS   | DRGCKKGRMDP     | QSKGIQTGRVCVYKERLKTCEVSAWCPIEEVEDAPRPA    | 180   |       |             |
|                                                                                      |       | ++PTRRT+CSS   | DRGCKKG MDP     | QSKGIQTGRVCVY+ KTCEVSAWCPIE VE+APRPA      |       |       |             |
| Sbjct                                                                                | 121   | EYPTRRTLCS    | SDRGCKKGWMDP    | QSKGIQTGRVCVYEGNQKTCEVSAWCPIEAVEEAPRPA    | 180   |       |             |
| Query                                                                                | 181   | LLNSAENFTV    | LIKNNIDFPGH     | NYTTRNILPGVNITCTFHKTQNPQCPIFRLGDIFQETGD   | 240   |       |             |
|                                                                                      |       | LLNSAENFTV    | LIKNNIDFPGH     | NYTTRNILPG+NITCTFHKTQNPQCPIFRLGDIF+ETGD   |       |       |             |
| Sbjct                                                                                | 181   | LLNSAENFTV    | LIKNNIDFPGH     | NYTTRNILPGLNITCTFHKTQNPQCPIFRLGDIFRETGD   | 240   |       |             |
| Query                                                                                | 241   | NFSDVAIQGG    | IMGIEIYWDCN     | LDGWFFHCRPKYSFRRLDDKTNTNESLYPGYNFRYAKYYK  | 300   |       |             |
|                                                                                      |       | NFSDVAIQGG    | IMGIEIYWDCN     | LDWFHCRPKYSFRRLDDKTN SLYPGYNFRYAKYYK      |       |       |             |
| Sbjct                                                                                | 241   | NFSDVAIQGG    | IMGIEIYWDCN     | LDLRFHCRPKYSFRRLDDKTNTNVS LYPGYNFRYAKYYK  | 300   |       |             |
| Query                                                                                | 301   | ENNVEKRTL     | IKVFGIRFDIL     | VFGTGGKFNVIQLAVYIGSVISYFGLATVFIDILINTYSS  | 360   |       |             |
|                                                                                      |       | ENNVEKRTL     | IKVFGIRFDIL     | VFGTGGKF++IQL VYIGS +SYFGLA VFID LI+TYSS  |       |       |             |
| Sbjct                                                                                | 301   | ENNVEKRTL     | IKVFGIRFDIL     | VFGTGGKFDIIQLVVYIGSTLSYFGLAAVFIDFLIDTYSS  | 360   |       |             |
| Query                                                                                | 361   | KCCRSRIYPC    | FKCCEYCAVNE     | YYYRKKKSEPIAEPKPTLKYVSFVDETHIRMVDQQLLGKS  | 420   |       |             |
|                                                                                      |       | CCRS IYP KCC+ | C VNEYYYRKK E I | EPKPTLKYVSFVDE+HIRMV+QQLLG+S              |       |       |             |
| Sbjct                                                                                | 361   | NCCRSHIYP     | WCKCCQPCVV      | NEYYYRKKCESIVEPKPTLKYVSFVDESHIRMVNQQLLGRS | 420   |       |             |
| Query                                                                                | 421   | LQNVKGEKV     | QRPVDFDLSR      | LSLSCDPTPIPGQPEEMQLFSEEVT                 | 480   |       |             |
|                                                                                      |       | LQ+VKG++V     | RP++DFTDLSR     | L+L D PIPGQPEE+QL +E TPRS +SP WCQCG       |       |       |             |
| Sbjct                                                                                | 421   | LQDVKGQEV     | PRPAMDFTDLSR    | LPLALHDTPIPGQPEEIQLLRKEATPRS              | 480   |       |             |
| Query                                                                                | 481   | HCLPSQLPES    | HRCLEELCCR      | KKAGACITTSEPFRKLVLRSQVLQFLLLYQEPLLVDGNS   | 540   |       |             |
|                                                                                      |       | CLPSQLPES     | HRCLEELCCR      | KK GACITTSE FRKLVLRS VLQFLLLYQEPLL LD +S  |       |       |             |
| Sbjct                                                                                | 481   | SCLPSQLPES    | HRCLEELCCR      | KKPGACITTSELFRKLVLRSRHLQFLLLYQEPLLALDVS   | 540   |       |             |
| Query                                                                                | 541   | S-SRLRHCA     | YRCYTTWRF       | GSPDLADFAILPSCCRWRIRREFPKSEGQYTG          | 595   |       |             |
|                                                                                      |       | + SRLRHCA     | YRCY TWRFGS     | D+ADFAILPSCCRWRIR+EFPKSEGQY+GF+SPY        |       |       |             |
| Sbjct                                                                                | 541   | TNSRLRHCA     | YRCYATWRF       | GSDMADFAILPSCCRWRIRKEFPKSEGQYSGFKSPY      | 595   |       |             |

Residues highlighted in yellow form the allosteric binding site that accommodates JNJ-47965567.
