# Supplementary material
Source: MDPI journal article supplement (https://www.mdpi.com/1424-8247/17/5/592)
Supplement: s1 [file s1]

**Table S1.** Structures, inhibitory activities, and Shape Tanimoto score values of some known P2X7 receptor allosteric antagonists that were applied to the proposed shape-based model.

| Compound ID(s) | Structure                                                                          | Inhibitory activity(ies) (IC <sub>50</sub> , pIC <sub>50</sub> , K <sub>d</sub> , pA <sub>2</sub> , or percentage of inhibition) | Reference(s)                                                  | Shape Tanimoto score value |
|----------------|------------------------------------------------------------------------------------|----------------------------------------------------------------------------------------------------------------------------------|---------------------------------------------------------------|----------------------------|
| 8n             | 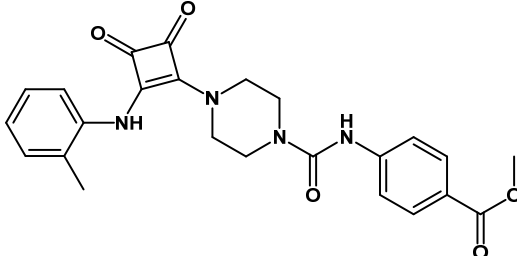  | pIC <sub>50</sub> = 6.99 ± 0.31                                                                                                  | Patberg et al. <i>Eur. J. Med. Chem.</i> , 226, 113838, 2021. | 0.694                      |
| 8o             |   | pIC <sub>50</sub> = 6.13 ± 0.15                                                                                                  | Patberg et al. <i>Eur. J. Med. Chem.</i> , 226, 113838, 2021. | 0.693                      |
| 8m             |  | pIC <sub>50</sub> = 7.13 ± 0.11                                                                                                  | Patberg et al. <i>Eur. J. Med. Chem.</i> , 226, 113838, 2021. | 0.693                      |

|    |                                                                                    |                                   |                                                                  |       |
|----|------------------------------------------------------------------------------------|-----------------------------------|------------------------------------------------------------------|-------|
| 8l | 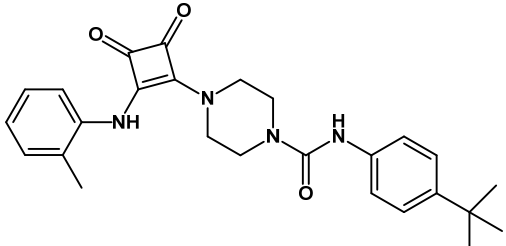  | $\text{pIC}_{50} = 6.96 \pm 0.11$ | Patberg et al. <i>Eur. J. Med. Chem.</i> ,<br>226, 113838, 2021. | 0.691 |
| 8j |   | $\text{pIC}_{50} = 6.51 \pm 0.19$ | Patberg et al. <i>Eur. J. Med. Chem.</i> ,<br>226, 113838, 2021. | 0.668 |
| 8i |   | $\text{pIC}_{50} = 6.80 \pm 0.16$ | Patberg et al. <i>Eur. J. Med. Chem.</i> ,<br>226, 113838, 2021. | 0.668 |
| 8h |  | $\text{pIC}_{50} = 6.12 \pm 0.09$ | Patberg et al. <i>Eur. J. Med. Chem.</i> ,<br>226, 113838, 2021. | 0.668 |

|            |                                                                                     |                                                                       |                                                                                                                                                                                           |       |
|------------|-------------------------------------------------------------------------------------|-----------------------------------------------------------------------|-------------------------------------------------------------------------------------------------------------------------------------------------------------------------------------------|-------|
| 8g         | 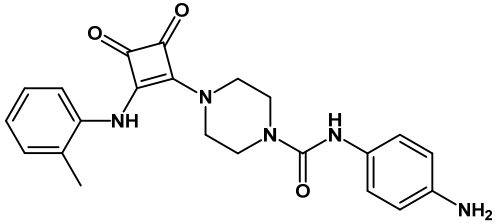   | $pIC_{50} = 6.42 \pm 0.15$                                            | Patberg et al. <i>Eur. J. Med. Chem.</i> , 226, 113838, 2021.                                                                                                                             | 0.668 |
| 8p         |    | $pIC_{50} = 7.80 \pm 0.09$                                            | Patberg et al. <i>Eur. J. Med. Chem.</i> , 226, 113838, 2021.                                                                                                                             | 0.667 |
| AZ11645373 |   | $IC_{50} = 5 - 90 \text{ nM}$ ,<br>depending on the<br>type of assay. | Stoke et al. <i>Br. J. Pharmacol.</i> , 149, 880-887, 2006.<br>Michel et al. <i>Br. J. Pharmacol.</i> , 156, 1312-1325, 2009.<br>Dayel et al. <i>Mol. Pharmacol.</i> , 96, 355-363, 2019. | 0.646 |
| 8k         |  | $pIC_{50} = 6.82 \pm 0.10$                                            | Patberg et al. <i>Eur. J. Med. Chem.</i> , 226, 113838, 2021.                                                                                                                             | 0.645 |

|            |                                                                                     |                                    |                                                                                                                                        |       |
|------------|-------------------------------------------------------------------------------------|------------------------------------|----------------------------------------------------------------------------------------------------------------------------------------|-------|
| 8f         | 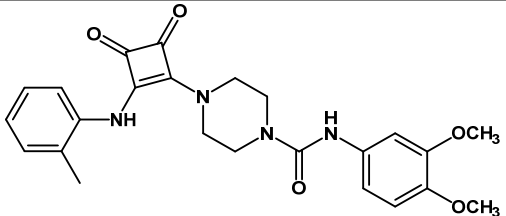   | $pIC_{50} = 6.52 \pm 0.18$         | Patberg et al. <i>Eur. J. Med. Chem.</i> , 226, 113838, 2021.                                                                          | 0.643 |
| 4n         |    | $pIC_{50} = 6.31 \pm 0.18$         | Patberg et al. <i>Eur. J. Med. Chem.</i> , 226, 113838, 2021.                                                                          | 0.638 |
| 9o         |    | $IC_{50} = (13.11 \pm 0.25) \mu M$ | Mahmood et al. <i>Eur. J. Med. Chem.</i> , 238, 114491, 2022.                                                                          | 0.630 |
| Compound 4 |   | $pA_2 = 6.9$                       | Alcaraz et al. <i>Bioorg. Med. Chem. Lett.</i> , 13, 4043-4046, 2003.<br>Jackson et al. <i>Eur. J. Med. Chem.</i> , 914, 174667, 2022. | 0.626 |
| 19         |  | $IC_{50} = (100.0 \pm 10.1) nM$    | Homerin et al. <i>J. Med. Chem.</i> , 63, 2074-2094, 2020.                                                                             | 0.626 |

|                                         |                                                                                     |                                                                                        |                                                                                                                    |       |
|-----------------------------------------|-------------------------------------------------------------------------------------|----------------------------------------------------------------------------------------|--------------------------------------------------------------------------------------------------------------------|-------|
| <b>Compound-17</b><br><b>AZ10606120</b> | 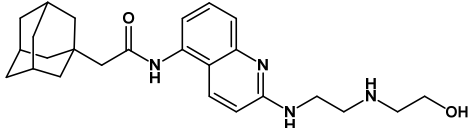   | $IC_{50} = 231 \text{ nM}$                                                             | Michel et al. <i>Br. J. Pharmacol.</i> , 153, 737-750, 2008.<br>Karasawa & Kawate. <i>eLife</i> , 5, e22153, 2016. | 0.618 |
| <b>9h</b>                               |    | $IC_{50} = (1.64 \pm 0.07) \mu\text{M}$                                                | Mahmood et al. <i>Eur. J. Med. Chem.</i> , 238, 114491, 2022.                                                      | 0.617 |
| <b>A740003</b>                          |    | $IC_{50} = 69.3 \text{ nM}$<br>$pIC_{50} = 7.1 \pm 0.05$<br>(Against P2X7-2N $\beta$ ) | Karasawa & Kawate. <i>eLife</i> , 5, e22153, 2016.<br>Allsopp et al. <i>Mol. Pharmacol.</i> , 93, 553-562, 2018.   | 0.617 |
| <b>9q</b>                               |   | $IC_{50} = (0.018 \pm 0.06) \mu\text{M}$                                               | Mahmood et al. <i>Eur. J. Med. Chem.</i> , 238, 114491, 2022.                                                      | 0.604 |
| <b>GW791343</b>                         |  | $IC_{50} = 8.9 \mu\text{M}$                                                            | Michel et al. <i>Br. J. Pharmacol.</i> , 153, 737-750, 2008.<br>Karasawa & Kawate. <i>eLife</i> , 5, e22153, 2016. | 0.601 |

|               |                                                                                     |                                            |                                                                                                                          |       |
|---------------|-------------------------------------------------------------------------------------|--------------------------------------------|--------------------------------------------------------------------------------------------------------------------------|-------|
| 16a           | 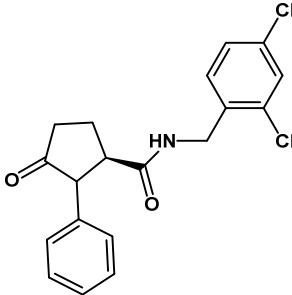   | $IC_{50} = (10000.0 \pm 151.1) \text{ nM}$ | Homerin et al. <i>J. Med. Chem.</i> , 63, 2074-2094, 2020.                                                               | 0.598 |
| Calmidazolium |    | $IC_{50} = 15 \text{ nM}$                  | Virgino et al. <i>Neuropharmacol.</i> , 36, 1285-1294, 1997.<br>Dayel et al. <i>Mol. Pharmacol.</i> , 96, 355-363, 2019. | 0.597 |
| 8d            |   | $pIC_{50} = 6.87 \pm 0.07$                 | Patberg et al. <i>Eur. J. Med. Chem.</i> , 226, 113838, 2021.                                                            | 0.595 |
| Z1456467176   |  | $IC_{50} = 3.416 \text{ }\mu\text{M}$      | Li et al. <i>Front. Pharmacol.</i> , 13, 979939, 2022.                                                                   | 0.594 |

|                     |                                                                                    |                                                                     |                                                                                                                                    |       |
|---------------------|------------------------------------------------------------------------------------|---------------------------------------------------------------------|------------------------------------------------------------------------------------------------------------------------------------|-------|
| <b>ZINC58368839</b> | 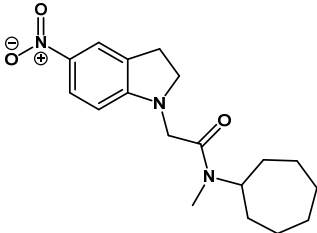  | $IC_{50} = 1.0 - 4.8 \mu M$ ,<br>depending on the<br>type of assay. | Caseley et al. <i>Biochem. Pharmacol.</i> ,<br>116, 130-139, 2016.<br>Dayel et al. <i>Mol. Pharmacol.</i> , 96, 355-<br>363, 2019. | 0.594 |
| <b>8c</b>           |   | $pIC_{50} = 7.19 \pm 0.16$                                          | Patberg et al. <i>Eur. J. Med. Chem.</i> ,<br>226, 113838, 2021.                                                                   | 0.594 |
| <b>Compound 5</b>   |   | -                                                                   | Jackson et al. <i>Eur. J. Med. Chem.</i> ,<br>914, 174667, 2022.                                                                   | 0.588 |
| <b>4i</b>           |  | Inhibition (% at 10<br>$\mu M$ ) = $35 \pm 18$                      | Patberg et al. <i>Eur. J. Med. Chem.</i> ,<br>226, 113838, 2021.                                                                   | 0.583 |

|     |                                                                                     |                                                     |                                                               |       |
|-----|-------------------------------------------------------------------------------------|-----------------------------------------------------|---------------------------------------------------------------|-------|
| 4m  | 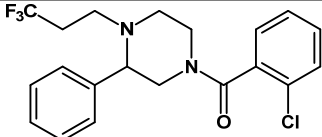   | $\text{pIC}_{50} = 6.00 \pm 0.04$                   | Patberg et al. <i>Eur. J. Med. Chem.</i> , 226, 113838, 2021. | 0.582 |
| 4d  |    | $\text{pIC}_{50} = 4.31 \pm 0.28$                   | Patberg et al. <i>Eur. J. Med. Chem.</i> , 226, 113838, 2021. | 0.577 |
| 65  |    | $\text{IC}_{50} = (2406.0 \pm 855.0) \text{ nM}$    | Homerin et al. <i>J. Med. Chem.</i> , 63, 2074-2094, 2020.    | 0.571 |
| 52a |    | $\text{IC}_{50} = (9557.0 \pm 756.0) \text{ nM}$    | Homerin et al. <i>J. Med. Chem.</i> , 63, 2074-2094, 2020.    | 0.567 |
| 4o  |   | Inhibition (% , at 10 $\mu\text{M}$ ) = $34 \pm 10$ | Patberg et al. <i>Eur. J. Med. Chem.</i> , 226, 113838, 2021. | 0.567 |
| 4l  |  | Inhibition (% , at 10 $\mu\text{M}$ ) = $19 \pm 10$ | Patberg et al. <i>Eur. J. Med. Chem.</i> , 226, 113838, 2021. | 0.567 |



|     |                                                                                    |                                                   |                                                               |       |
|-----|------------------------------------------------------------------------------------|---------------------------------------------------|---------------------------------------------------------------|-------|
| 52b | 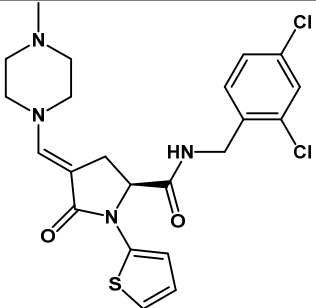  | $IC_{50} = (6947.0 \pm 486.0) \text{ nM}$         | Homerin et al. <i>J. Med. Chem.</i> , 63, 2074-2094, 2020.    | 0.566 |
| 8e  |   | $pIC_{50} = 7.06 \pm 0.02$                        | Patberg et al. <i>Eur. J. Med. Chem.</i> , 226, 113838, 2021. | 0.566 |
| 4f  |   | Inhibition (% at 10 $\mu\text{M}$ ) = $4 \pm 5$   | Patberg et al. <i>Eur. J. Med. Chem.</i> , 226, 113838, 2021. | 0.566 |
| 4c  |  | Inhibition (% at 10 $\mu\text{M}$ ) = $14 \pm 10$ | Patberg et al. <i>Eur. J. Med. Chem.</i> , 226, 113838, 2021. | 0.564 |

|    |                                                                                     |                                                     |                                                               |       |
|----|-------------------------------------------------------------------------------------|-----------------------------------------------------|---------------------------------------------------------------|-------|
| 8a | 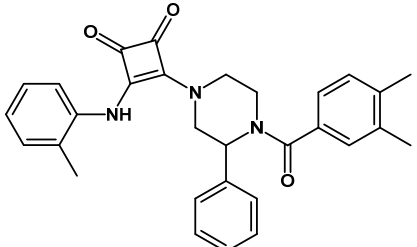   | $\text{pIC}_{50} = 6.26 \pm 0.12$                   | Patberg et al. <i>Eur. J. Med. Chem.</i> , 226, 113838, 2021. | 0.563 |
| 4e |    | $\text{pIC}_{50} = 4.08 \pm 0.40$                   | Patberg et al. <i>Eur. J. Med. Chem.</i> , 226, 113838, 2021. | 0.563 |
| 60 |    | $\text{IC}_{50} = (3168.0 \pm 1023.0) \text{ nM}$   | Homerin et al. <i>J. Med. Chem.</i> , 63, 2074-2094, 2020.    | 0.562 |
| 4k |   | Inhibition (% , at 10 $\mu\text{M}$ ) = $29 \pm 11$ | Patberg et al. <i>Eur. J. Med. Chem.</i> , 226, 113838, 2021. | 0.558 |
| 4h |  | Inhibition (% , at 10 $\mu\text{M}$ ) = $29 \pm 11$ | Patberg et al. <i>Eur. J. Med. Chem.</i> , 226, 113838, 2021. | 0.558 |

|     |                                                                                    |                                               |                                                                  |       |
|-----|------------------------------------------------------------------------------------|-----------------------------------------------|------------------------------------------------------------------|-------|
| 16n | 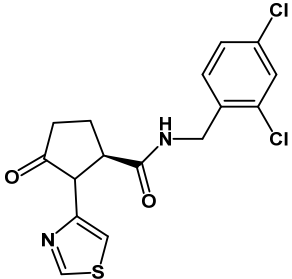  | $IC_{50} = (256.4 \pm 1.0)$<br>nM             | Homerin et al. <i>J. Med. Chem.</i> , 63,<br>2074-2094, 2020.    | 0.557 |
| 4j  |   | Inhibition (% at 10<br>$\mu$ M) = $31 \pm 24$ | Patberg et al. <i>Eur. J. Med. Chem.</i> ,<br>226, 113838, 2021. | 0.557 |
| 29c |   | $IC_{50} = (1130.3 \pm 120.2)$<br>nM          | Homerin et al. <i>J. Med. Chem.</i> , 63,<br>2074-2094, 2020.    | 0.556 |
| 16l |  | $IC_{50} = (199.5 \pm 15.5)$<br>nM            | Homerin et al. <i>J. Med. Chem.</i> , 63,<br>2074-2094, 2020.    | 0.556 |

|     |                                                                                     |                                    |                                                                   |       |
|-----|-------------------------------------------------------------------------------------|------------------------------------|-------------------------------------------------------------------|-------|
| 16j | 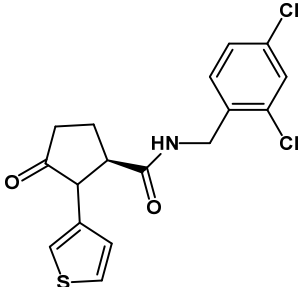   | $IC_{50} = (813.2 \pm 56.7)$<br>nM | Homerin et al. <i>J. Med. Chem.</i> , 63,<br>2074-2094, 2020.     | 0.556 |
| 16i |    | $IC_{50} = (229.0 \pm 4.5)$<br>nM  | Homerin et al. <i>J. Med. Chem.</i> , 63,<br>2074-2094, 2020.     | 0.556 |
| 8b  |   | $pIC_{50} = 6.65 \pm 0.14$         | Patberg et al. <i>Eur. J. Med. Chem.</i> ,<br>226, 113838, 2021.  | 0.556 |
| 34  |  | $IC_{50} = (33.9 \pm 11)$<br>nM    | Wilkinson et al. <i>ACS Chem. Neurosci.</i> , 8, 2374-2380, 2017. | 0.556 |

|     |                                                                                    |                                          |                                                                   |       |
|-----|------------------------------------------------------------------------------------|------------------------------------------|-------------------------------------------------------------------|-------|
| 16k | 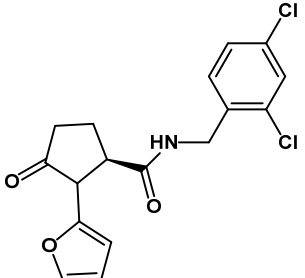  | $IC_{50} = (244.0 \pm 105.0) \text{ nM}$ | Homerin et al. <i>J. Med. Chem.</i> , 63, 2074-2094, 2020.        | 0.555 |
| 39  |   | $IC_{50} = (234 \pm 30) \text{ nM}$      | Wilkinson et al. <i>ACS Chem. Neurosci.</i> , 8, 2374-2380, 2017. | 0.554 |
| 16m |   | $IC_{50} = (415.0 \pm 85.0) \text{ nM}$  | Homerin et al. <i>J. Med. Chem.</i> , 63, 2074-2094, 2020.        | 0.550 |
| 71  |  | -                                        | Homerin et al. <i>J. Med. Chem.</i> , 63, 2074-2094, 2020.        | 0.548 |

|                   |                                                                                     |                                                |                                                                                                                                       |       |
|-------------------|-------------------------------------------------------------------------------------|------------------------------------------------|---------------------------------------------------------------------------------------------------------------------------------------|-------|
| <b>4g</b>         | 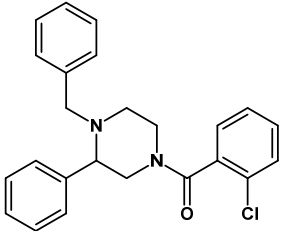   | Inhibition (% at 10 $\mu$ M) = $21 \pm 12$     | Patberg et al. <i>Eur. J. Med. Chem.</i> , 226, 113838, 2021.                                                                         | 0.547 |
| <b>33</b>         |    | IC <sub>50</sub> = $(30.9 \pm 8.0)$ nM         | Wilkinson et al. <i>ACS Chem. Neurosci.</i> , 8, 2374-2380, 2017.                                                                     | 0.546 |
| <b>51c</b>        |    | -                                              | Homerin et al. <i>J. Med. Chem.</i> , 63, 2074-2094, 2020.                                                                            | 0.543 |
| <b>Compound 1</b> |   | IC <sub>50</sub> = $(18 \pm 2)$ nM             | O'Brien-Brown et al. <i>Eur. J. Med. Chem.</i> , 130, 433-439, 2017.<br>Jackson et al. <i>Eur. J. Med. Chem.</i> , 914, 174667, 2022. | 0.539 |
| <b>PS10</b>       |  | IC <sub>50</sub> = $(0.010 \pm 0.002)$ $\mu$ M | Pacheco et al. <i>Molecules</i> , 28, 590, 2023.                                                                                      | 0.534 |

|            |                                                                                     |                                                             |                                                                                                                                    |       |
|------------|-------------------------------------------------------------------------------------|-------------------------------------------------------------|------------------------------------------------------------------------------------------------------------------------------------|-------|
| 50g        | 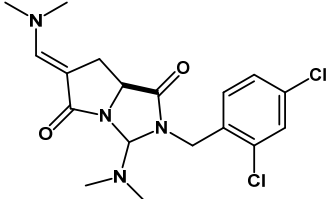   | -                                                           | Homerin et al. <i>J. Med. Chem.</i> , 63, 2074-2094, 2020.                                                                         | 0.531 |
| 28         |    | IC <sub>50</sub> = (25.1 ± 2.7) nM                          | Wilkinson et al. <i>ACS Chem. Neurosci.</i> , 8, 2374-2380, 2017.                                                                  | 0.531 |
| 1b         |    | IC <sub>50</sub> = (119.3 ± 7.0) nM                         | Homerin et al. <i>J. Med. Chem.</i> , 63, 2074-2094, 2020.                                                                         | 0.529 |
| 4b         |    | Inhibition (% at 10 μM) = -11 ± 14                          | Patberg et al. <i>Eur. J. Med. Chem.</i> , 226, 113838, 2021.                                                                      | 0.528 |
| GSK1482160 |   | K <sub>d</sub> = (1.15 ± 0.12) nM                           | Territo et al. <i>J. Nucl. Med.</i> , 58, 458-465, 2007.<br>Ali et al. <i>Br. J. Clin. Pharmacol.</i> , 75, 197-207, 2012.         | 0.528 |
| 1          |  | IC <sub>50</sub> = (10.5 ± 3.1) nM<br>pA <sub>2</sub> = 8.8 | Wilkinson et al. <i>ACS Chem. Neurosci.</i> , 8, 2374-2380, 2017.<br>Jackson et al. <i>Eur. J. Med. Chem.</i> , 914, 174667, 2022. | 0.526 |

|         |                                                                                     |                                    |                                                                   |       |
|---------|-------------------------------------------------------------------------------------|------------------------------------|-------------------------------------------------------------------|-------|
| 9       | 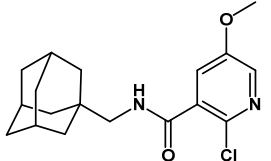   | IC <sub>50</sub> = (148 ± 25) nM   | Wilkinson et al. <i>ACS Chem. Neurosci.</i> , 8, 2374-2380, 2017. | 0.525 |
| 2       |    | IC <sub>50</sub> = (324 ± 78) nM   | Wilkinson et al. <i>ACS Chem. Neurosci.</i> , 8, 2374-2380, 2017. | 0.525 |
| 13      |    | IC <sub>50</sub> = (1410 ± 180) nM | Wilkinson et al. <i>ACS Chem. Neurosci.</i> , 8, 2374-2380, 2017. | 0.524 |
| A804598 |    | IC <sub>50</sub> = 21.7 nM         | Karasawa & Kawate. <i>eLife</i> , 5, e22153, 2016.                | 0.524 |
| 17      |   | IC <sub>50</sub> = (2240 ± 190) nM | Wilkinson et al. <i>ACS Chem. Neurosci.</i> , 8, 2374-2380, 2017. | 0.523 |
| 3       |  | IC <sub>50</sub> = (63.1 ± 9.4) nM | Wilkinson et al. <i>ACS Chem. Neurosci.</i> , 8, 2374-2380, 2017. | 0.522 |



|                |                                                                                    |                                                         |                                                                  |       |
|----------------|------------------------------------------------------------------------------------|---------------------------------------------------------|------------------------------------------------------------------|-------|
| <b>1a</b>      | 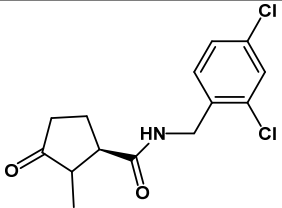  | $IC_{50} = (474.0 \pm 12.0)$<br>nM                      | Homerin et al. <i>J. Med. Chem.</i> , 63,<br>2074-2094, 2020.    | 0.506 |
| <b>30b</b>     |   | $IC_{50} = (3461.2 \pm 523.0)$<br>nM                    | Homerin et al. <i>J. Med. Chem.</i> , 63,<br>2074-2094, 2020.    | 0.501 |
| <b>4a</b>      |   | $pIC_{50} = 4.08 \pm 0.40$                              | Patberg et al. <i>Eur. J. Med. Chem.</i> ,<br>226, 113838, 2021. | 0.485 |
| <b>A438079</b> |  | $pIC_{50} = 6.0 \pm 0.05$<br>(Against P2X7-2N $\beta$ ) | Allsopp et al. <i>Mol. Pharmacol.</i> , 93,<br>553-562, 2018.    | 0.481 |

**Brilliant blue G**

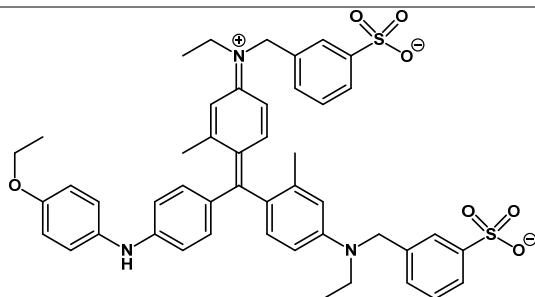

$pIC_{50} = 6.23 \pm 0.10$

Dayel et al. *Mol. Pharmacol.*, 96, 355-363, 2019.

0.470

**KN62**

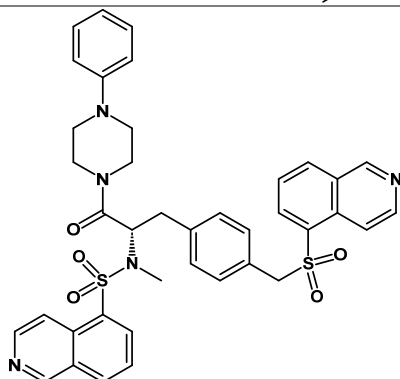

$pIC_{50} = 7.55 \pm 0.09$

Michel et al. *Br. J. Pharmacol.*, 151, 84-95, 2007.  
Michel et al. *Br. J. Pharmacol.*, 153, 737-750, 2008.  
Dayel et al. *Mol. Pharmacol.*, 96, 355-363, 2019.

0.467

## References

- Alcaraz, L.; Baxter, A.; Bent, J.; Bowers, K.; Braddock, M.; Cladingboel, D.; Donald, D.; Fagura, M.; Furber, M.; Laurent, C.; et al. Novel P2X7 Receptor Antagonists. *Bioorg Med Chem Lett* **2003**, 13, 4043–4046, doi:10.1016/j.bmcl.2003.08.033.
- Ali, Z.; Laurijssens, B.; Ostefeld, T.; Mchugh, S.; Stylianou, A.; Scott-Stevens, P.; Hosking, L.; Dewit, O.; Richardson, J.C.; Chen, C. Pharmacokinetic and Pharmacodynamic Profiling of a P2X7 Receptor Allosteric Modulator GSK1482160 in Healthy Human Subjects. *Br J Clin Pharmacol* **2013**, 75, 197–207, doi:10.1111/j.1365-2125.2012.04320.x.
- Allsopp, R.C.; Dayl, S.; Dayel, A. Bin; Schmid, R.; Evans, R.J. Mapping the Allosteric Action of Antagonists A740003 and A438079 Reveals a Role for the Left Flipper in Ligand Sensitivity at P2X7 Receptorss. *Mol Pharmacol* **2018**, 93, 553–562, doi:10.1124/mol.117.111021.
- Caseley, E.A.; Muench, S.P.; Fishwick, C.W.; Jiang, L.H. Structure-Based Identification and Characterisation of Structurally Novel Human P2X7 Receptor Antagonists. *Biochem Pharmacol* **2016**, 116, 130–139, doi:10.1016/j.bcp.2016.07.020.

- Dayel, A. Bin; Evans, R.J.; Schmid, R. Mapping the Site of Action of Human P2X7 Receptor Antagonists AZ11645373, Brilliant Blue G, KN-62, Calmidazolium, and Zinc58368839 to the Intersubunit Allosteric Pocket. *Mol Pharmacol* **2019**, *96*, 355–363, doi:10.1124/mol.119.116715.
- Homerin, G.; Jawhara, S.; Dezitter, X.; Baudalet, D.; Dufrénoy, P.; Rigo, B.; Millet, R.; Furman, C.; Ragé, G.; Lipka, E.; et al. Pyroglutamide-Based P2X7 Receptor Antagonists Targeting Inflammatory Bowel Disease. *J Med Chem* **2020**, *63*, 2074–2094, doi:10.1021/acs.jmedchem.9b00584.
- Jackson, A.; Werry, E.L.; O'Brien-Brown, J.; Schiavini, P.; Wilkinson, S.; Wong, E.C.N.; McKenzie, A.D.J.; Maximova, A.; Kassiou, M. Pharmacological Characterization of a Structural Hybrid P2X7R Antagonist Using ATP and LL-37. *Eur J Pharmacol* **2022**, *914*, doi:10.1016/j.ejphar.2021.174667.
- Janssen, B.; Vugts, D.J.; Wilkinson, S.M.; Ory, D.; Chalon, S.; Hoozemans, J.J.M.; Schuit, R.C.; Beaino, W.; Kooijman, E.J.M.; Van Den Hoek, J.; et al. Identification of the Allosteric P2X7 Receptor Antagonist [11C]SMW139 as a PET Tracer of Microglial Activation. *Sci Rep* **2018**, *8*, doi:10.1038/s41598-018-24814-0.
- Karasawa, A.; Kawate, T. Structural Basis for Subtype-Specific Inhibition of the P2X7 Receptor. *eLife* **2016**, doi:10.7554/eLife.22153.001.
- Li, X.; Liu, Y.; Luo, C.; Tao, J. Z1456467176 Alleviates Gouty Arthritis by Allosterically Modulating P2X7R to Inhibit NLRP3 Inflammasome Activation. *Front Pharmacol* **2022**, *13*, doi:10.3389/fphar.2022.979939.
- Mahmood, A.; Villinger, A.; Iqbal, J. Therapeutic Potentials and Structure-Activity Relationship of 1,3-Benzodioxole N-Carbamothioyl Carboxamide Derivatives as Selective and Potent Antagonists of P2X4 and P2X7 Receptors. *Eur J Med Chem* **2022**, *238*, doi:10.1016/j.ejmech.2022.114491.
- Michel, A.D.; Chambers, L.J.; Clay, W.C.; Condreay, J.P.; Walter, D.S.; Chessell, I.P. Direct Labelling of the Human P2X 7 Receptor and Identification of Positive and Negative Cooperativity of Binding. *Br J Pharmacol* **2007**, *151*, 84–95, doi:10.1038/sj.bjp.0707196.
- Michel, A.D.; Chambers, L.J.; Walter, D.S. Negative and Positive Allosteric Modulators of the P2X 7 Receptor. *Br J Pharmacol* **2008**, *153*, 737–750, doi:10.1038/sj.bjp.0707625.
- Michel, A.D.; Ng, S.W.; Roman, S.; Clay, W.C.; Dean, D.K.; Walter, D.S. Mechanism of Action of Species-Selective P2X 7 Receptor Antagonists. *Br J Pharmacol* **2009**, *156*, 1312–1325, doi:10.1111/j.1476-5381.2009.00135.x.
- O'Brien-Brown, J.; Jackson, A.; Reekie, T.A.; Barron, M.L.; Werry, E.L.; Schiavini, P.; McDonnell, M.; Munoz, L.; Wilkinson, S.; Noll, B.; et al. Discovery and Pharmacological Evaluation of a Novel Series of Adamantyl Cyanoguanidines as P2X7 Receptor Antagonists. *Eur J Med Chem* **2017**, *130*, 433–439, doi:10.1016/j.ejmech.2017.02.060.
- Pacheco, P.A.F.; Gonzaga, D.T.G.; von Ranke, N.L.; Rodrigues, C.R.; da Rocha, D.R.; da Silva, F. de C.; Ferreira, V.F.; Faria, R.X. Synthesis, Biological Evaluation and Molecular Modeling Studies of Naphthoquinone Sulfonamides and Sulfonate Ester Derivatives as P2X7 Inhibitors. *Molecules* **2023**, *28*, doi:10.3390/molecules28020590.
- Patberg, M.; Isaak, A.; Füsser, F.; Ortiz Zacarías, N. V.; Vinnenberg, L.; Schulte, J.; Michetti, L.; Grey, L.; van der Horst, C.; Hundehege, P.; et al. Piperazine Squaric Acid Diamides, a Novel Class of Allosteric P2X7 Receptor Antagonists. *Eur J Med Chem* **2021**, *226*, doi:10.1016/j.ejmech.2021.113838.
- Stokes, L.; Jiang, L.H.; Alcaraz, L.; Bent, J.; Bowers, K.; Fagura, M.; Furber, M.; Mortimore, M.; Lawson, M.; Theaker, J.; et al. Characterization of a Selective and Potent Antagonist of Human P2X 7 Receptors, AZ11645373. *Br J Pharmacol* **2006**, *149*, 880–887, doi:10.1038/sj.bjp.0706933.
- Territo, P.R.; Meyer, J.A.; Peters, J.S.; Riley, A.A.; McCarthy, B.P.; Gao, M.; Min, W.; Green, M.A.; Zheng, Q.H.; Hutchins, G.D. Characterization of 11C-GSK1482160 for Targeting the P2X7 Receptor as a Biomarker for Neuroinflammation. *Journal of Nuclear Medicine* **2017**, *58*, 458–465, doi:10.2967/jnumed.116.181354.

Virginio, C.; Church, D.; North, R.A.; Surprenant, A. Effects of Divalent Cations, Protons and Calmidazolium at the Rat P2X7 Receptor. *Neuropharmacol* **1997**, 36 1285-1294, doi: 10.1016/s0028-3908(97)00141-x.

Wilkinson, S.M.; Barron, M.L.; O'Brien-Brown, J.; Janssen, B.; Stokes, L.; Werry, E.L.; Chishty, M.; Skarratt, K.K.; Ong, J.A.; Hibbs, D.E.; et al. Pharmacological Evaluation of Novel Bioisosteres of an Adamantanyl Benzamide P2X7 Receptor Antagonist. *ACS Chem Neurosci* **2017**, 8, 2374–2380, doi:10.1021/acscchemneuro.7b00272.
